# Supplementary figures and images for: Improvement of Severe Fatigue Following Nuclease Therapy in Patients With Primary Sjögren’s Syndrome: A Randomized Clinical Trial
Source: PubMed Central journal article supplement — Arthritis Rheumatol. 2020 Nov 22;73(1):143–50. doi: 10.1002/art.41489 (PMC7839752; doi:10.1002/art.41489), 2020-11-22

# M1.2

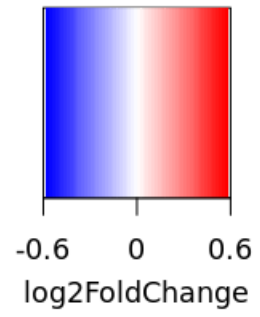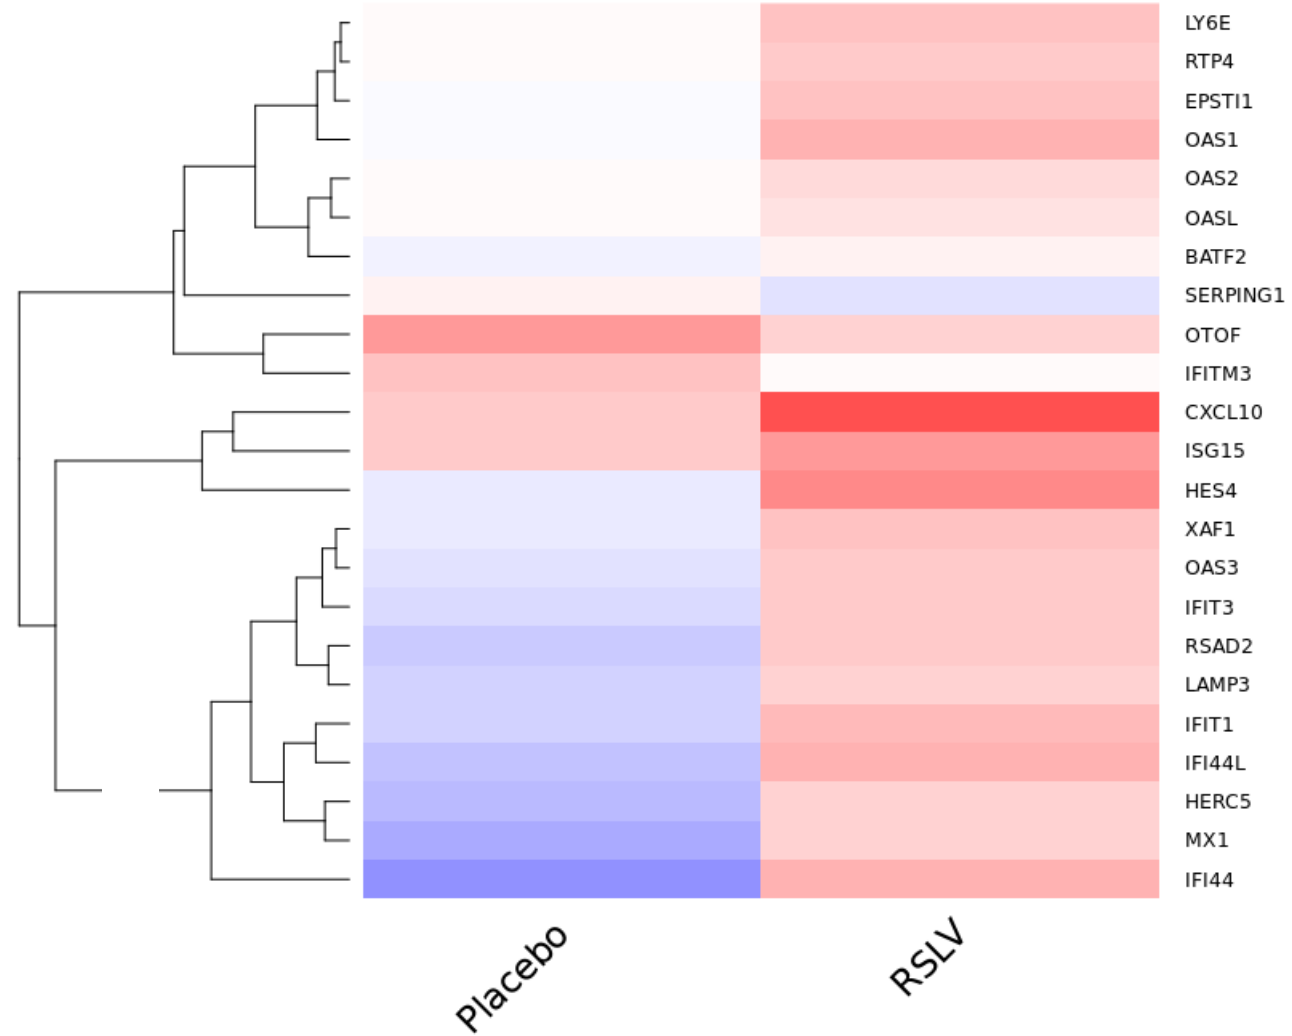

# M3.4

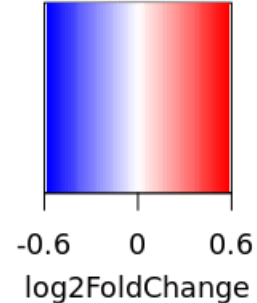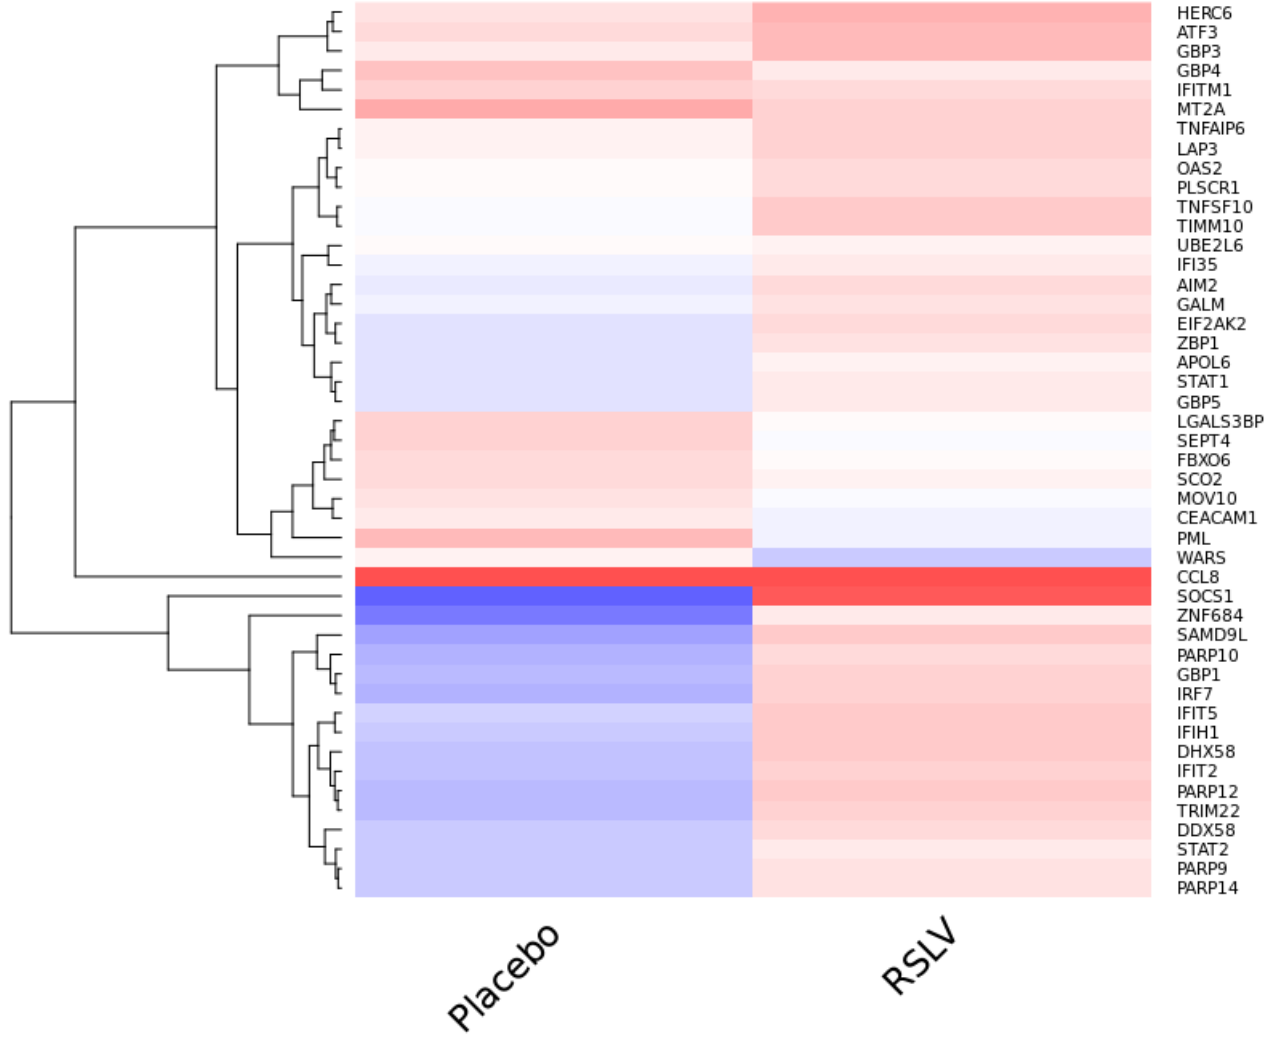

# M5.12

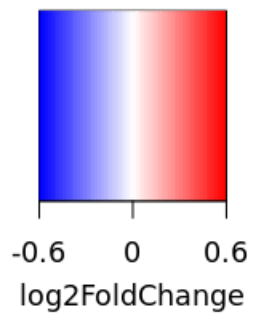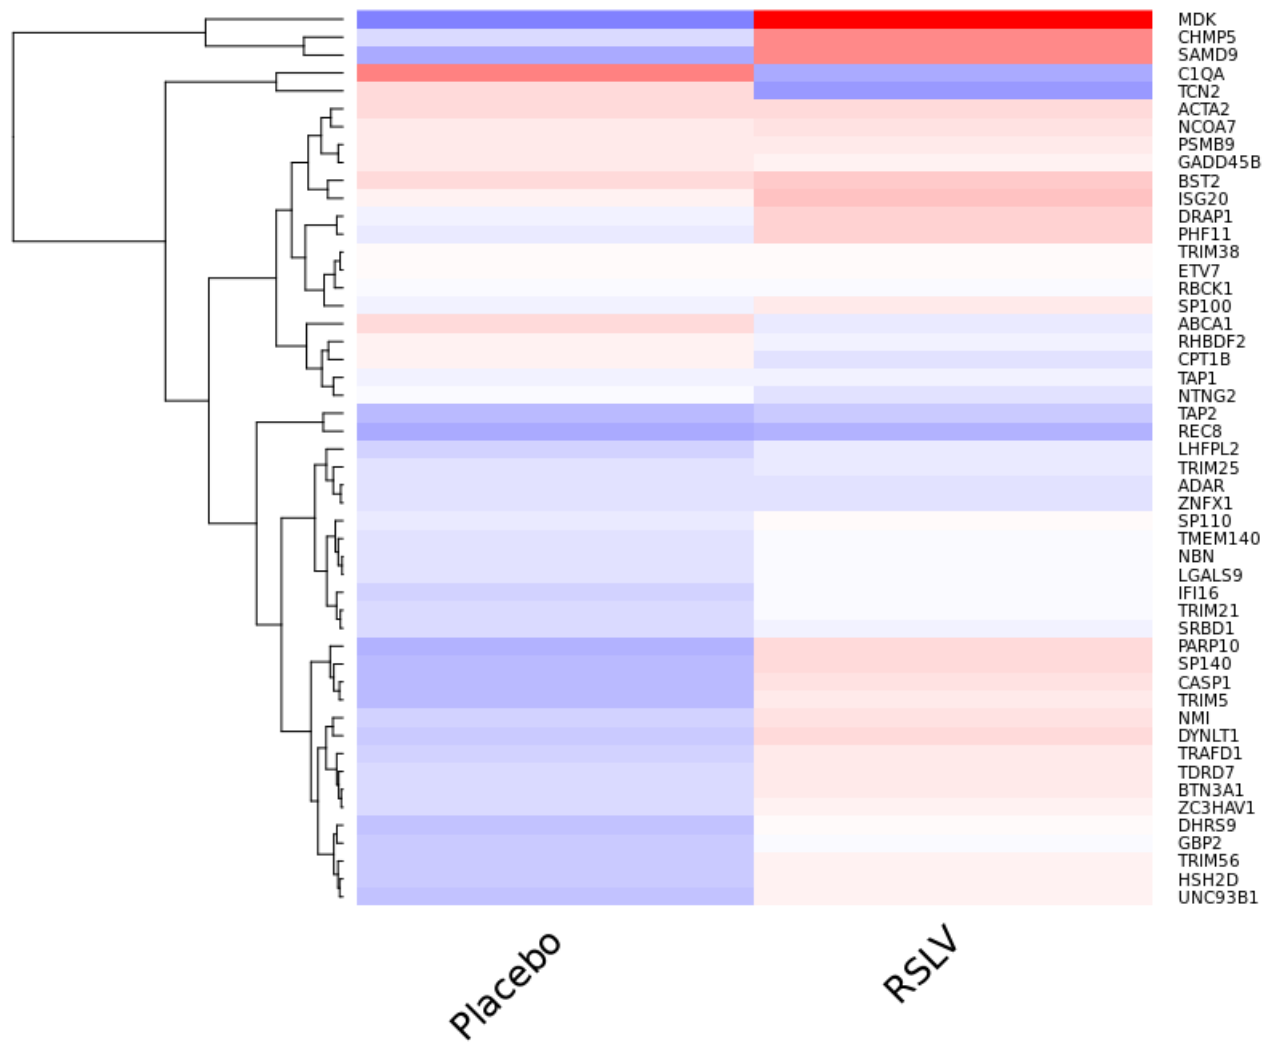

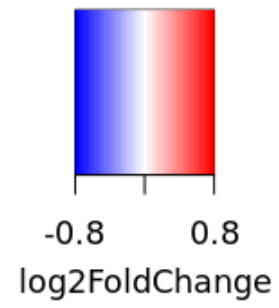

# M1.2

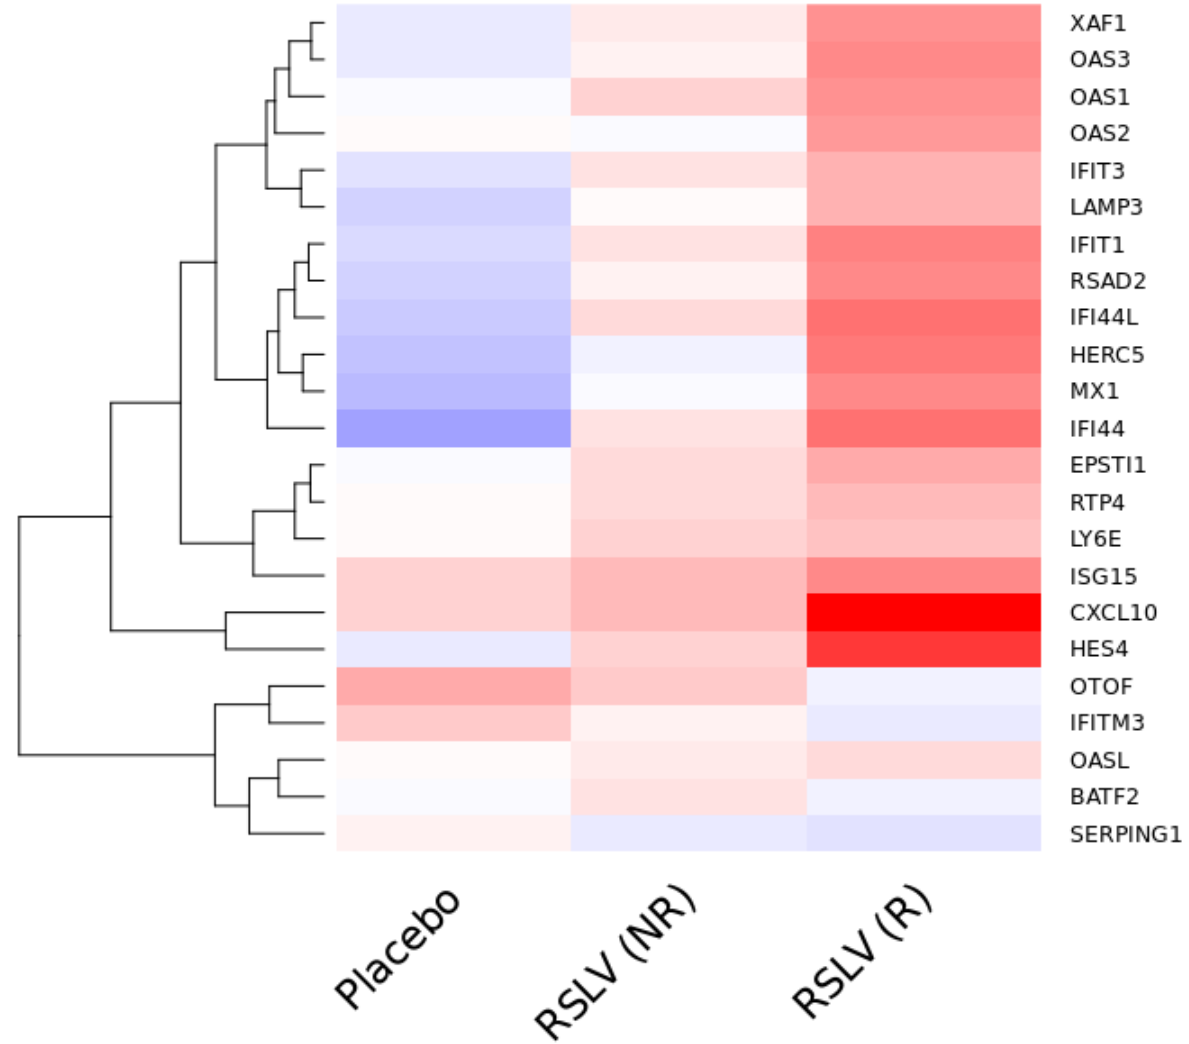

# M3.4

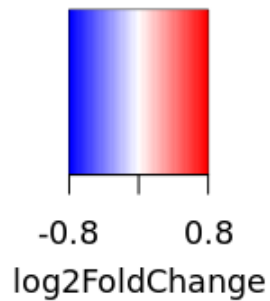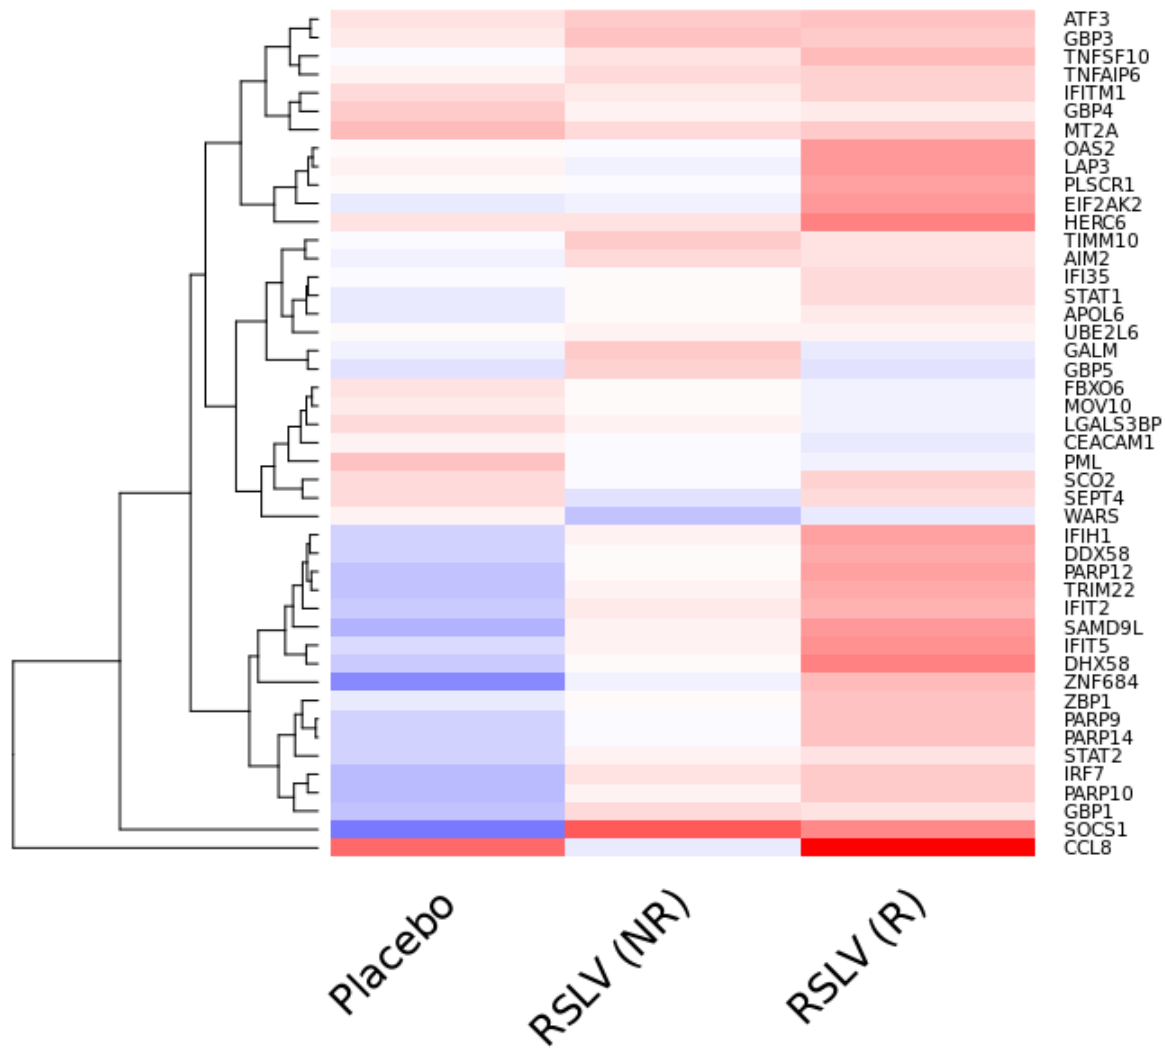

# M5.12

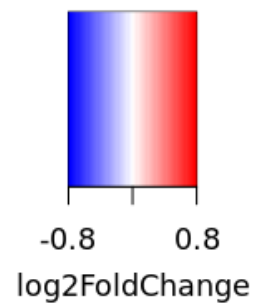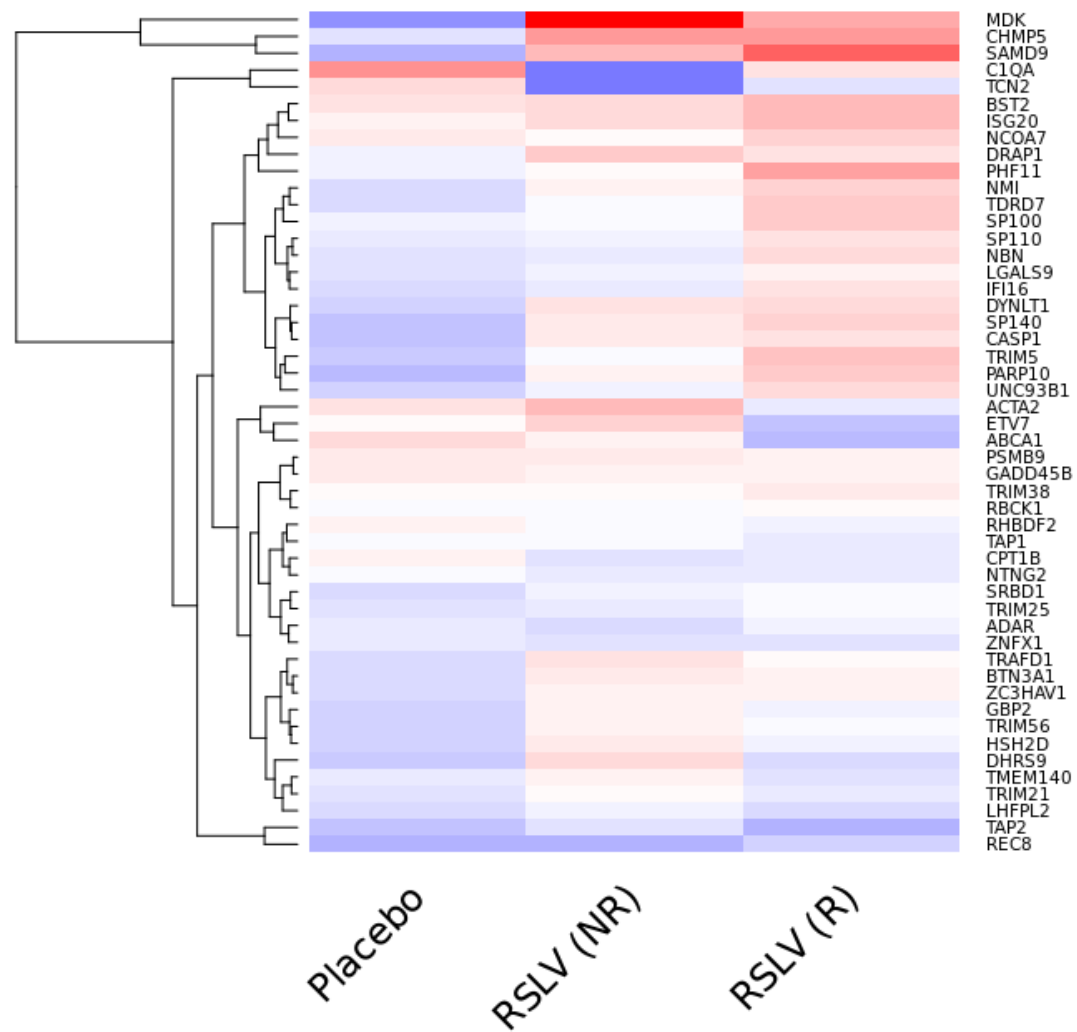

Supplement: ART-73-143-s001.pdf [file ART-73-143-s001.pdf]
